# Supplementary material for: Synthesis-dependent repair of Cpf1-induced double strand DNA breaks enables targeted gene replacement in rice
Source: PubMed Central journal article supplement (PMC6137971; doi:10.1093/jxb/ery245), 2018-06-28
Supplement: ery245_suppl_supplementary_figures_tables.pdf [file ery245_suppl_supplementary_figures_tables.pdf]

## Supplementary Data

### **Synthesis-dependent repair of Cpf1-induced double-strand DNA breaks enables targeted gene replacement in rice**

Shaoya Li<sup>1</sup>, Jingying Li<sup>1</sup>, Jiahui Zhang<sup>1</sup>, Wenming Du<sup>1</sup>, Jindong Fu<sup>1</sup>, Suhas Sutar<sup>1</sup>,  
Yunde Zhao<sup>2,3,\*</sup> and Lanqin Xia<sup>1,\*</sup>

#### **Contents**

##### **Fig. S1 The map of plasmids used in this study**

(A) pCXUN-LbCpf1-OsU3-RCR1-RCR2-left-armed-DRT

(B) pCXUN-LbCpf1-OsU3-RCR1-RCR2-armed-DRT

##### **Fig. S2 Sequences of the DRTs**

(A) DRT with only left homology arm

(B) DRT with two homology arms

##### **Table S1 The primer sets used in this study**

##### **Table S2 Characterization of regenerated rice plants in T<sub>0</sub> generation**

##### **Table S3 Analysis of potential off-target effects**

A

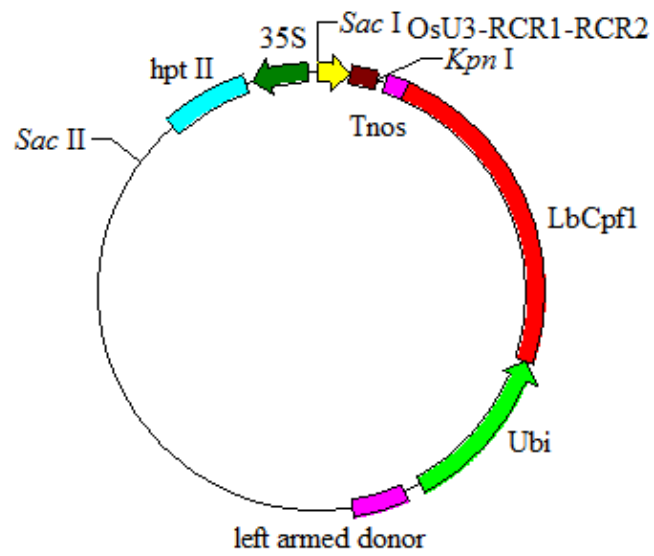

pCXUN-LbCpf1-OsU3-RGR1-RGR2-left-armed-DRT

B

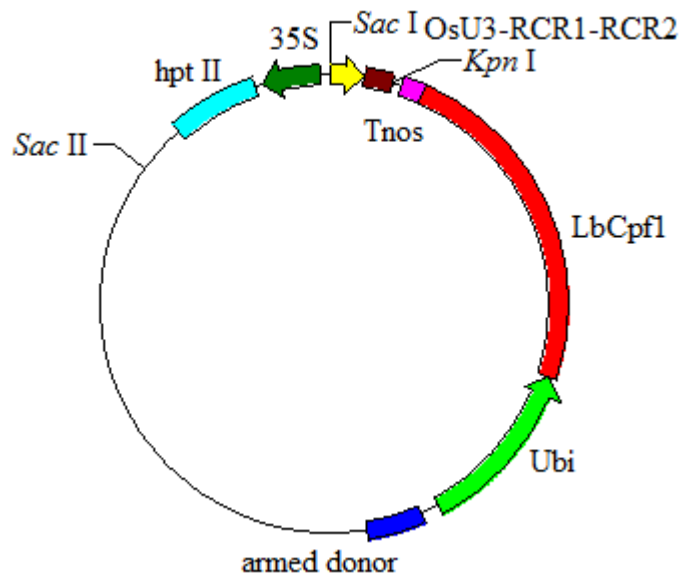

pCXUN-LbCpf1-OsU3-RGR1-RGR2-armed-DRT

**Fig. S1. A schematic show of the vectors used in this study**

(A) pCXUN-LbCpf1-OsU3-RGR1-RGR2-left-armed-DRT

(B) The map of pCXUN-LbCpf1-OsU3-RGR1-RGR2-armed-DRT

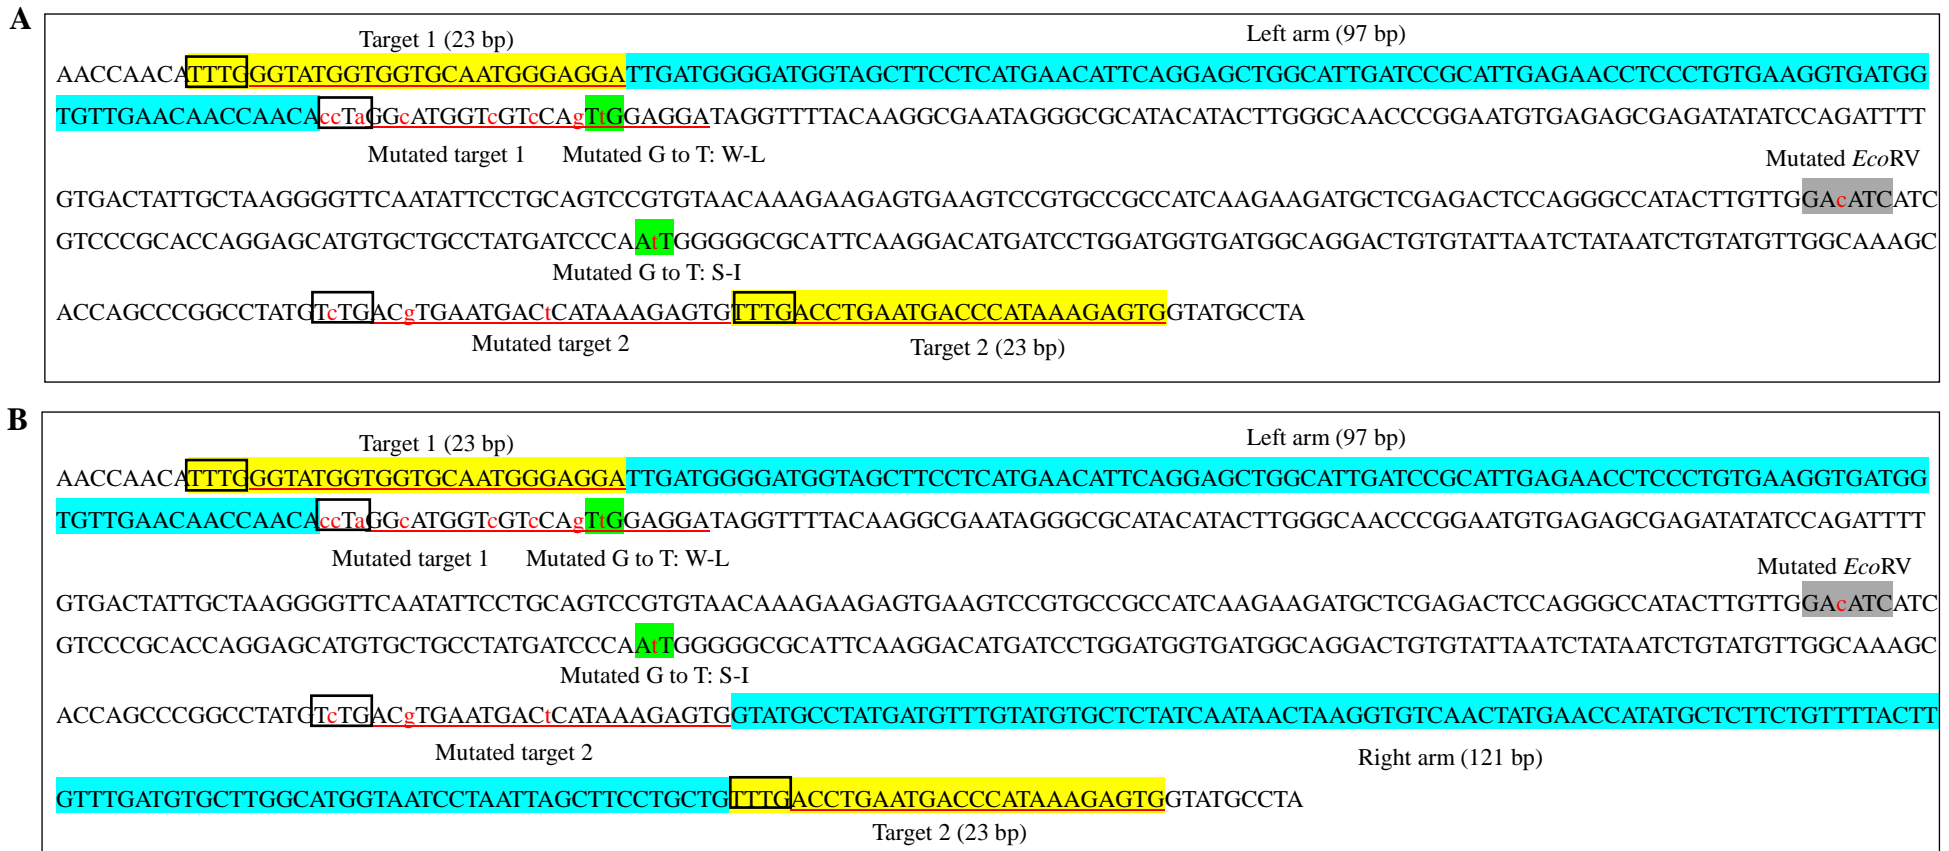

**Fig. S2. Sequences of the DRT with only left homology arm and the DRT with two homology arms**

(A) DRT with only left homology arm; (B) DRT with two homology arms. The sequences shadowed in yellow are derived from the wild-type *ALS* gene sequence, sequences of two targets are underlined, the PAM and mutated PAM sequences are boxed, the left and right arms are shadowed in blue, the mutated *EcoRV* target site are shadowed in gray, the mutated amino acids are shadowed in green, and the mutated synonymous changes in the donor are in red lower case.

**Table S1. The primer sets used in this study**

| Primer                           | Sequence (5' to 3')                                                                             | Use of PCR products                    | Annealing (°C) | Fragment size (bp) |
|----------------------------------|-------------------------------------------------------------------------------------------------|----------------------------------------|----------------|--------------------|
| RGR1F2<br>RGR-common-R           | TAATTTCTACTAAGTGTAGATGGTATGGTGGTGCAATGGGAGGAGGCCGGCATGGTCCCAGCCT<br>GTCCCATTCGCCATGCCGAAGC      | Construct vector for<br>RGR1           | 58             | 112                |
| RGRF1<br>RGR-common-R            | AAATTACTGATGAGTCCGTGAGGACGAAACGAGTAAGCTCGTCTAATTTCTACTAAGTGTAGAT<br>GTCCCATTCGCCATGCCGAAGC      | Construct vector for<br>RGR1 and RGR2  | 58             | 155                |
| RGR2-F2<br>RGR-common-R          | TAATTTCTACTAAGTGTAGATACCTGAATGACCCATAAAGAGTGGGCCGGCATGGTCCCAGCCT<br>GTCCCATTCGCCATGCCGAAGC      | Construct vector for<br>RGR2           | 58             | 112                |
| OsU3F<br>OsU3R<br>OsU3-RGR1R     | AAGGAATCTTTAAACATACGAACAGATCA<br>TGCCACGGATCATCTGCAC<br>CACGGACTCATCAGTAATTTTGCCACGGATCATCTGCAC | Construct vector for<br>OsU3-RGR1-RGR2 | 56             | 404                |
| RGR-Common-F<br>RGR1-10 random-R | AAATTACTGATGAGTCCGTGAGGAC<br>GTAATTTGGTTCGTATTCGTCCCATTCGCCATGCCG                               | Construct vector for<br>OsU3-RGR1-RGR2 | 58             | 172                |
| RGR2-10 random-F<br>Sac-RGR2R    | CGAATGGGACGAATACGACCAAATTACTGATGAGTCCGTGAGGAC<br>CCCTTTCGCCAGGGGTACCGGTCCCATTCGCCATGCCGAAGC     | Construct vector for<br>OsU3-RGR1-RGR2 | 58             | 195                |
| Sac-OsU3F<br>Sac-RGR2R           | GATTACGAATTCGAGCTCAAGGAATCTTTAAACATACGAACAGATCA<br>CCCTTTCGCCAGGGGTACCGGTCCCATTCGCCATGCCGAAGC   | Construct vector for<br>OsU3-RGR1-RGR2 | 58             | 739                |
| Pme-donorF<br>Pme-donorR         | GTTTCCCGCCTTCAGTTTAAACGTAAAACGACGGCCAGT<br>GTCAAACACTGATAGTTTAAACCAGGAAACAGCTATGAC              | Construct vector for donor             | 56             | 873                |

|                 |                                              |                                                                           |    |     |
|-----------------|----------------------------------------------|---------------------------------------------------------------------------|----|-----|
| donor-armLF     | AACCAACATTTGGGTATGGTG                        | Construct vector for donor<br>(with only left arm)                        | 60 | 486 |
| donor-armLR1    | CATAGGCCGGGCTGGT                             |                                                                           |    |     |
| donor-armLF     | AACCAACATTTGGGTATGGTG                        | Construct vector for donor<br>(with only left arm)                        | 58 | 522 |
| donor-armLR2    | CACTCTTATGGGTCATTCAGGTCAAACATAGGCCGGGCTGGT   |                                                                           |    |     |
| pme-donor-armLF | GTTTCCCGCCTTCAGTTTAAACAACCAACATTTGGGTATGGTG  | Construct vector for donor<br>(with only left arm)                        | 58 | 566 |
| pme-donor-armLR | GTCAAACACTGATAGTTTAAACCACTCTTATGGGTCATTCAGGT |                                                                           |    |     |
| ALSTestF        | GGCAATCATCGCTACTGGTG                         | Detect edited <i>ALS</i> gene in<br>calli                                 | 58 | 648 |
| T2MR            | CACTCTTATGAGTCATTCACGTCAG                    |                                                                           |    |     |
| ALSTestF        | GGCAATCATCGCTACTGGTG                         | Detect edited <i>ALS</i> gene in<br>plants                                | 58 | 803 |
| ALSTestR        | ATGCCTACAGAAAACAACACTACA                     |                                                                           |    |     |
| hptF            | GAGGGCGTGGATATGTCCTG                         | Detect <i>hptII</i> gene in plants                                        | 58 | 306 |
| hptR            | ATTGACCGATTCCCTTGCGGT                        |                                                                           |    |     |
| U3F             | AAGGAATCTTTAAACATACGAACAGATC                 | Detect crRNA sequence in<br>plants                                        | 57 | 509 |
| U3R             | TTGGATCCTCTAGAGATTATGTGG                     |                                                                           |    |     |
| LbCpf1F         | GCCTGTTGCACAAGGATTAGACTTC                    | Detect LbCpf1 transgene<br>in plants                                      | 58 | 684 |
| LbCpf1R         | GGAGCAGAGCTGTTCATGAGG                        |                                                                           |    |     |
| ALS-OFF1-F      | GCTGCTCTGTTGTCTGGGTC                         | Detect mutations on<br>putative off-target site of<br><i>ALS</i> target 1 | 59 | 800 |
| ALS-OFF1-R      | ACGAGCAACAGCCAGAATCA                         |                                                                           |    |     |

---

|            |                         |                                                                           |    |     |
|------------|-------------------------|---------------------------------------------------------------------------|----|-----|
| ALS-OFF2-F | GGTTGCAAAGTCACATGCGTG   | Detect mutations on<br>putative off-target site of<br><i>ALS</i> target 1 | 59 | 818 |
| ALS-OFF2-R | TCCGGAGATTCCTGACGTGAG   |                                                                           |    |     |
| ALS-OFF3-F | GGTTTACCTTTCTAGCGCACTTC | Detect mutations on<br>putative off-target site of<br><i>ALS</i> target 1 | 59 | 658 |
| ALS-OFF3-R | CGATGTTCTTAGGCGCACC     |                                                                           |    |     |
| ALS-OFF4-F | CACCCATAAGGAATGGGTCTTC  | Detect mutations on<br>putative off-target site of<br><i>ALS</i> target 2 | 57 | 999 |
| ALS-OFF4-R | GCTCTTGATTGGGCCGGC      |                                                                           |    |     |
| ALS-OFF5-F | CTACCTAGGGCAGCTGCTG     | Detect mutations on<br>putative off-target site of<br><i>ALS</i> target 2 | 59 | 524 |
| ALS-OFF5-R | CAGAGCCATCCCAGACTTTAC   |                                                                           |    |     |

---

**Table S2.Characterization and genotyping of regenerated plants in T<sub>0</sub> generation**

| Vector                                         | NO. of calli for transform | NO. of resistant calli | NO. of individual rice plants recovered | Line           | Genotype        |
|------------------------------------------------|----------------------------|------------------------|-----------------------------------------|----------------|-----------------|
| pCXUN-LbCpf1-OsU3-RG<br>R1-RGR2-left-armed-DRT | 152                        | 15                     | 71                                      | 171-2          | Heterozygous HR |
|                                                |                            |                        |                                         | 171-9          | chimeric HR     |
|                                                |                            |                        |                                         | 170-1<br>172-1 | Partial HR      |
| pCXUN-LbCpf1-OsU3-RG<br>R1-RGR2-armed-DRT      | 164                        | 20                     | 94                                      | 169-2          | chimeric HR     |
|                                                |                            |                        |                                         | 169-3          |                 |
|                                                |                            |                        |                                         | 168-2          | Partial HR      |
|                                                |                            |                        |                                         | 168-4          |                 |
|                                                |                            |                        |                                         | 168-5          |                 |
|                                                |                            |                        |                                         | 169-5          |                 |
|                                                |                            |                        |                                         | 169-6          | Random indels   |
| 169-1                                          |                            |                        |                                         |                |                 |

**Table S3. Analysis of potential off-target effects**

| Target   | Name of putative off-target site | Putative off-target locus | Sequence of the putative off-target site | No. of mismatching bases | No. of plants sequenced | No. of plants with mutations |
|----------|----------------------------------|---------------------------|------------------------------------------|--------------------------|-------------------------|------------------------------|
| Target 1 | ALS1-OFF1                        | chr02:4712511-4712537     | <u>TTTAG</u> AAATTGTTGTGCAAGGGGAGGA      | 5                        | 12                      | 12                           |
|          | ALS1-OFF2                        | chr05:26016305-26016331   | <u>TTTGGGTA</u> AGATCATGCAAAGGGAGAA      | 6                        | 12                      | 12                           |
|          | ALS1-OFF3                        | chr03:33738572-33738598   | <u>TTTG</u> ATTTGGTGGTGGAAATGGAAGAA      | 6                        | 12                      | 12                           |
| Target 2 | ALS2-OFF1                        | chr08:4284947-4284973     | <u>TTTCACCT</u> AAATAACCCATTAGGAGTA      | 5                        | 12                      | 12                           |
|          | ALS2-OFF2                        | chr07:584165-584191       | <u>TTTG</u> CCCTGGATGGCCCTTAAGAGGG       | 6                        | 12                      | 12                           |

Note: The PAM motif is underlined; mismatching bases are shown in red.
